# Supplementary material for: De novo transcriptome analysis of Perna viridis highlights tissue-specific patterns for environmental studies
Source: PubMed Central journal article supplement (PMC4190305; doi:10.1186/1471-2164-15-804), 2014-09-19
Supplement: 12864_2014_6498_MOESM1_ESM.pdf [file 12864_2014_6498_MOESM1_ESM.pdf]

**Additional file 1. Summary of raw reads data for *Perna viridis*.**

| Item                                          | Gills      |            | Hepatopancreas |            | Adductor muscle |             |
|-----------------------------------------------|------------|------------|----------------|------------|-----------------|-------------|
|                                               | Male       | Female     | Male           | Female     | Male            | Female      |
| <b>Throughput (Mb)</b>                        | 8,545      | 9,889      | 10,320         | 8,563      | 9,097           | 10,352      |
| <b>Number of reads</b>                        | 84,607,612 | 97,908,328 | 102,182,018    | 84,784,834 | 90,074,178      | 102,494,014 |
| <b>Sequence quality <math>\geq</math> Q30</b> | 87.60%     | 89.19%     | 85.09%         | 87.76%     | 85.39%          | 83.78%      |
| <b>Mean quality score</b>                     | 35         | 35         | 34             | 35         | 34              | 34          |
| <b>GC %</b>                                   | 39%        | 39%        | 40%            | 40%        | 42%             | 42%         |
