# Supplementary material for: De novo transcriptome analysis of Perna viridis highlights tissue-specific patterns for environmental studies
Source: PubMed Central journal article supplement (PMC4190305; doi:10.1186/1471-2164-15-804), 2014-09-19
Supplement: 12864_2014_6498_MOESM2_ESM.pdf [file 12864_2014_6498_MOESM2_ESM.pdf]

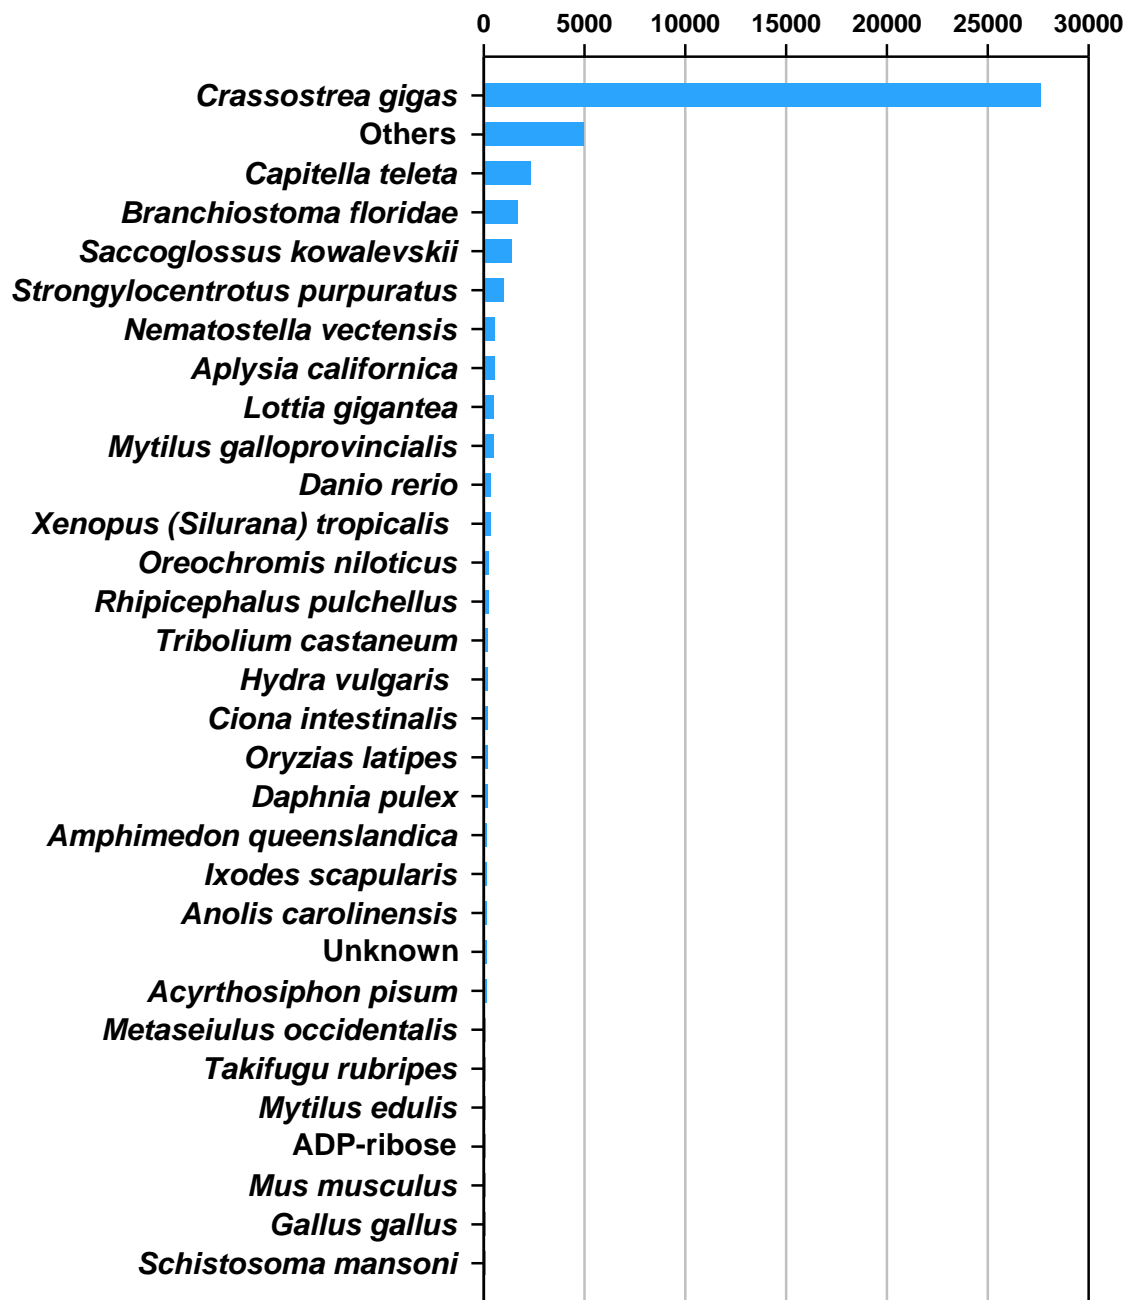

**Additional file 2. BLAST top-hit species distribution for assembled transcripts of *Perna viridis*.** Note: *Hydra vulgaris* was formerly classified as *Hydra magnipapillata*.
