# Supplementary material for: De novo transcriptome analysis of Perna viridis highlights tissue-specific patterns for environmental studies
Source: PubMed Central journal article supplement (PMC4190305; doi:10.1186/1471-2164-15-804), 2014-09-19
Supplement: 12864_2014_6498_MOESM3_ESM.pdf [file 12864_2014_6498_MOESM3_ESM.pdf]

## Biological process

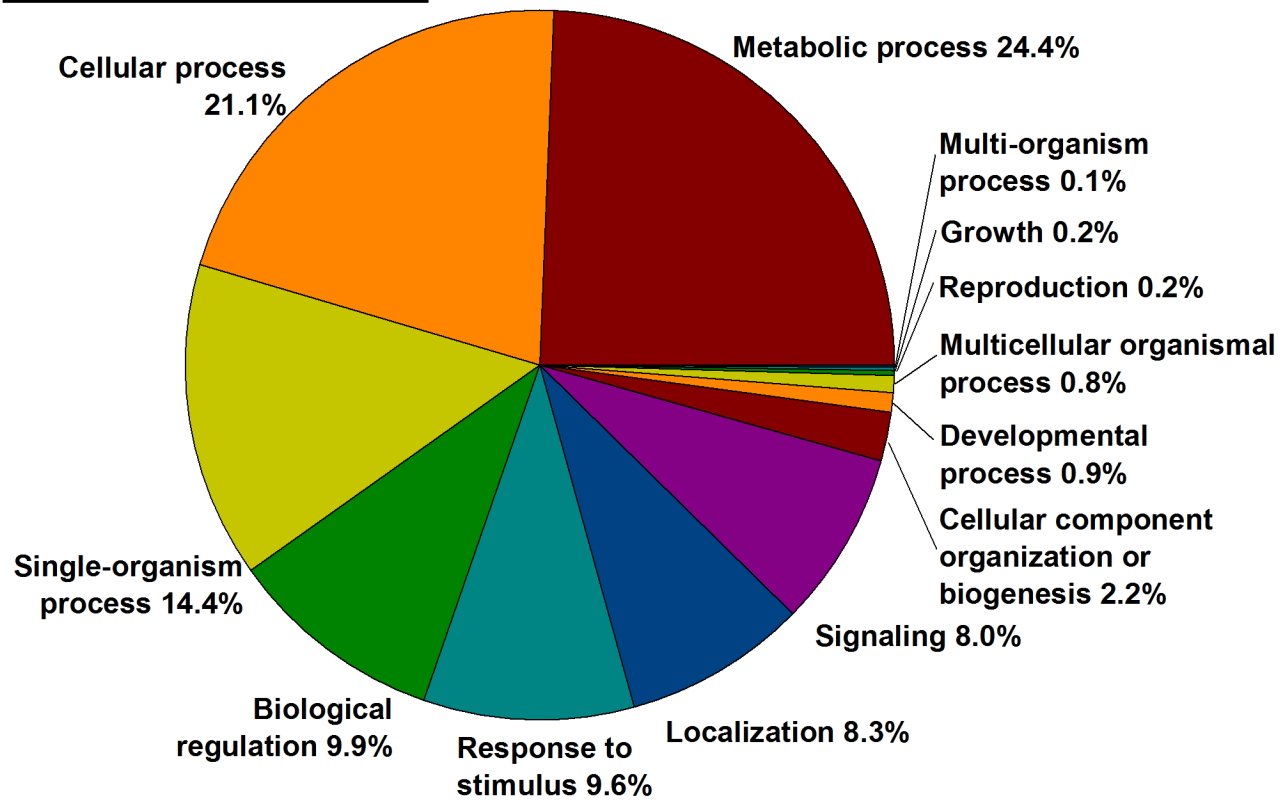

## Cellular component

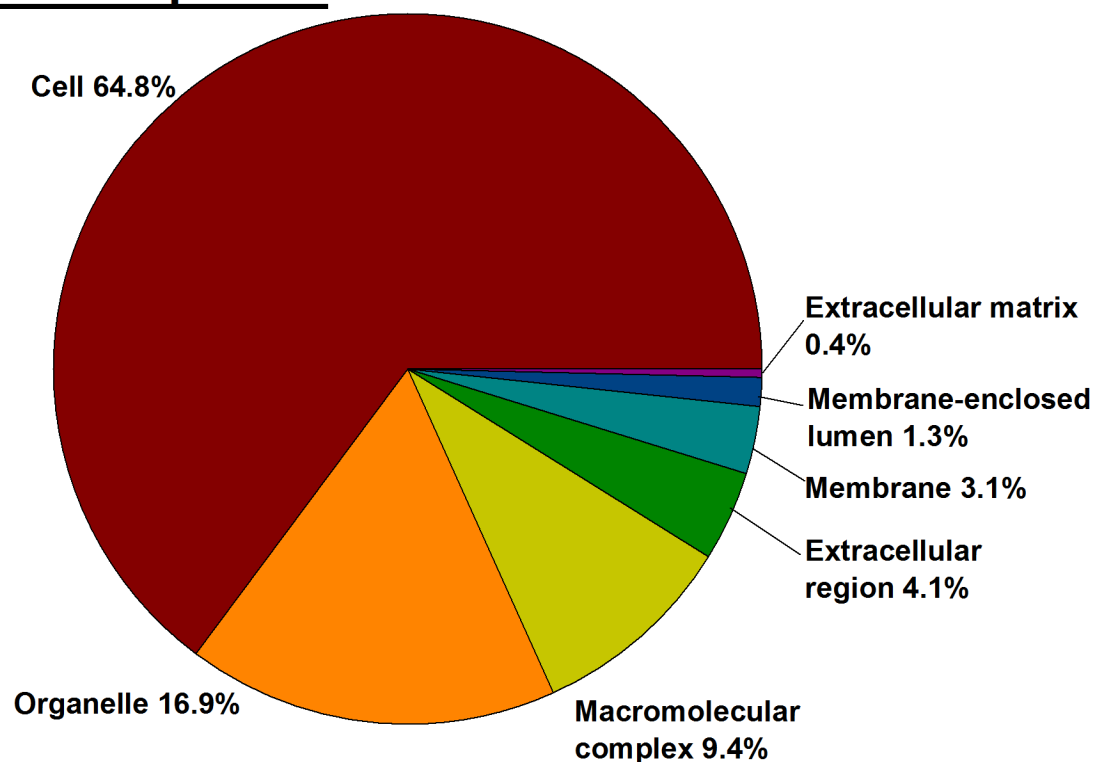

## Molecular function

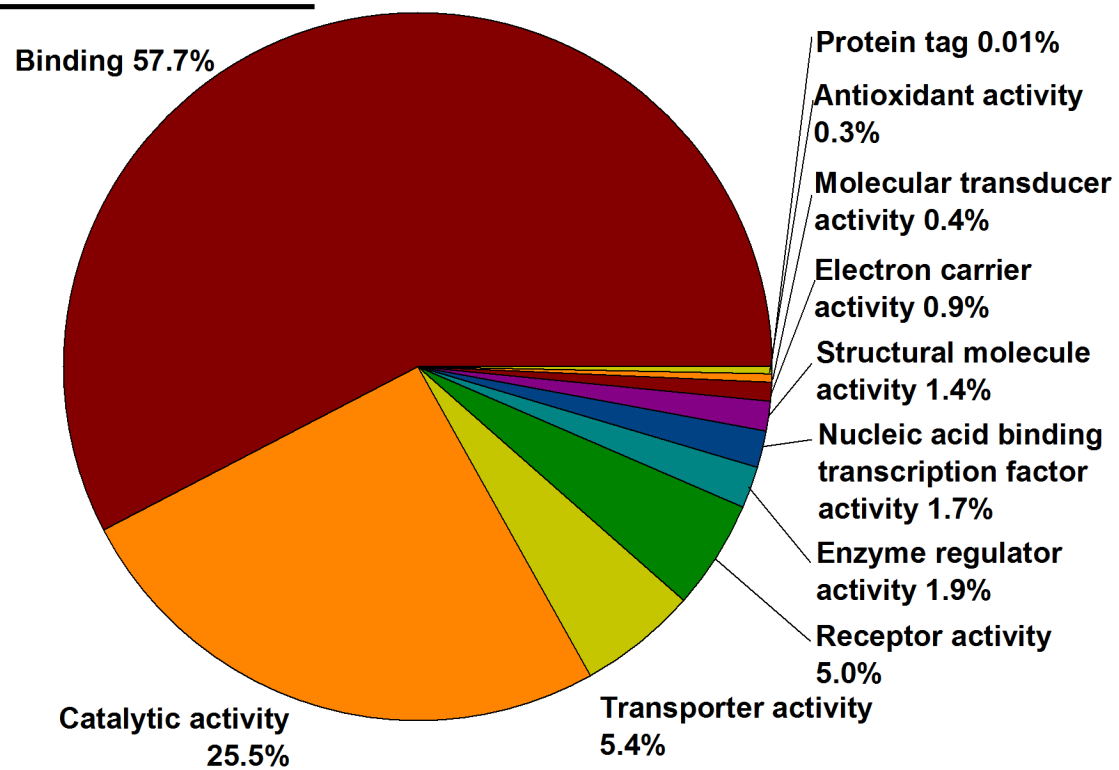

**Additional\_file\_3: Gene ontology (GO) annotations for the global transcriptome of *Perna viridis*.** GO terms were annotated at level 2 of classification according to three main categories (biological process, cellular component, and molecular function).
