# Supplementary material for: De novo transcriptome analysis of Perna viridis highlights tissue-specific patterns for environmental studies
Source: PubMed Central journal article supplement (PMC4190305; doi:10.1186/1471-2164-15-804), 2014-09-19
Supplement: 12864_2014_6498_MOESM5_ESM.pdf [file 12864_2014_6498_MOESM5_ESM.pdf]

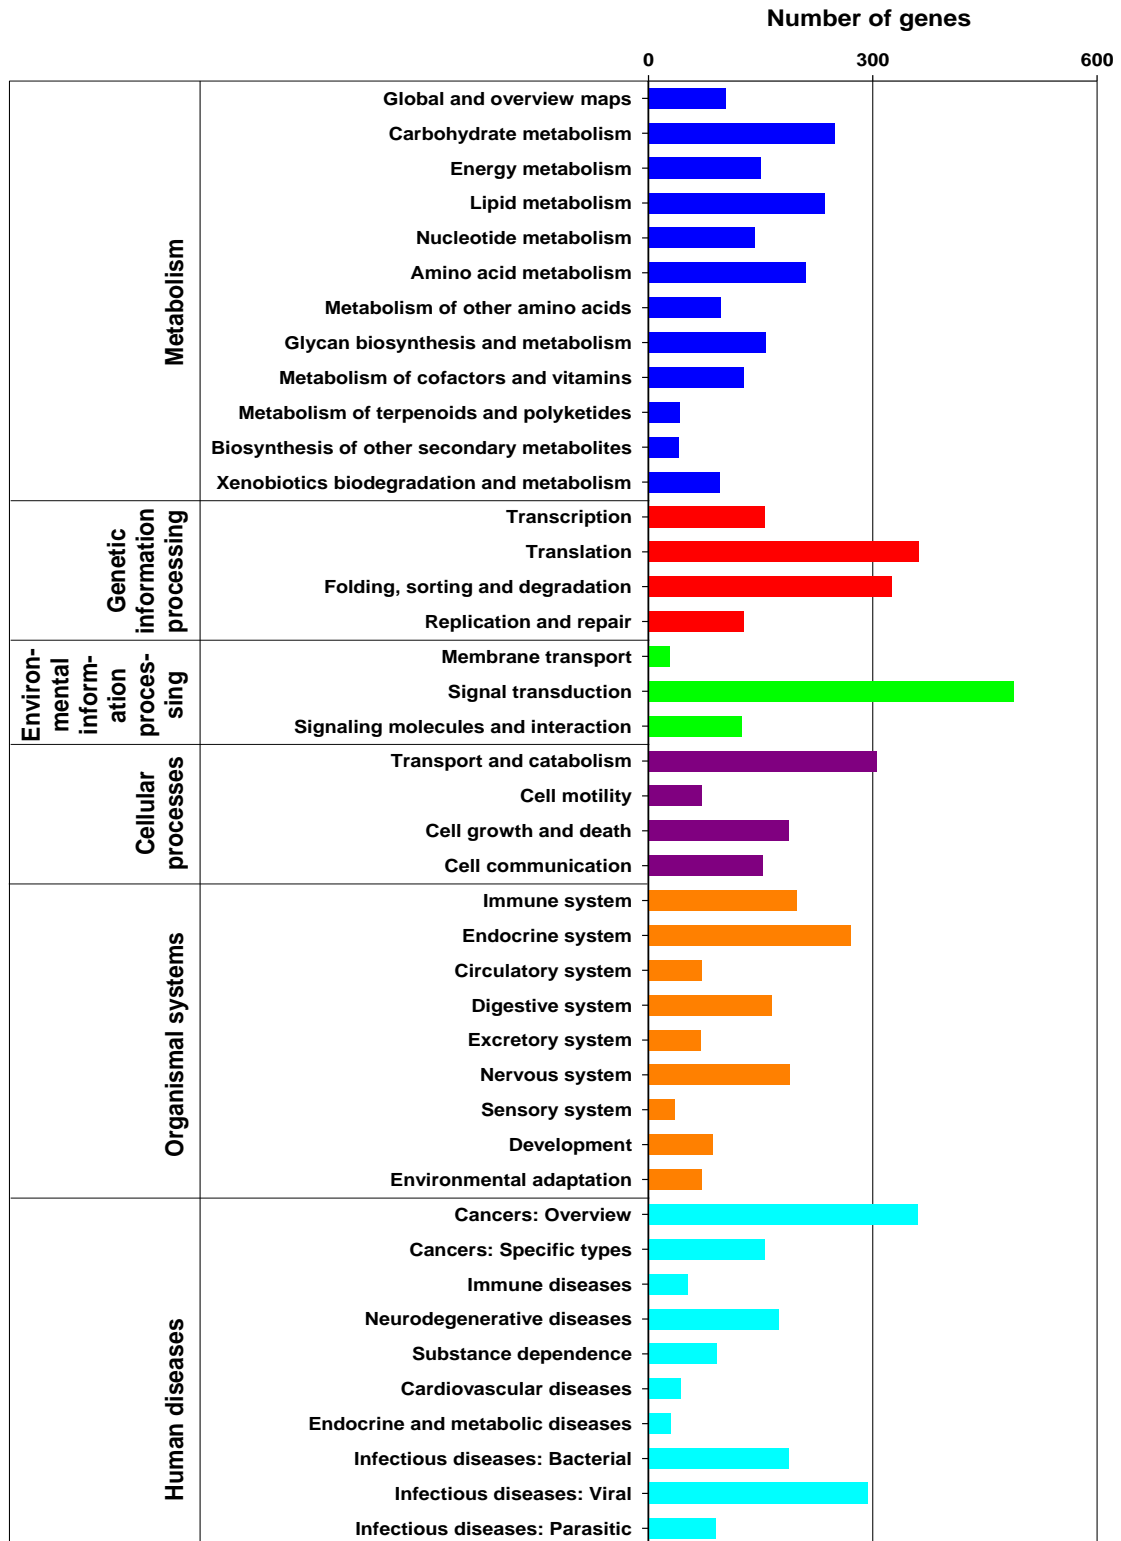

Additional file 5. Distribution of genes from *Perna viridis* with putative protein annotations assigned to the KEGG pathways.
