# Supplementary material for: De novo transcriptome analysis of Perna viridis highlights tissue-specific patterns for environmental studies
Source: PubMed Central journal article supplement (PMC4190305; doi:10.1186/1471-2164-15-804), 2014-09-19
Supplement: 12864_2014_6498_MOESM6_ESM.pdf [file 12864_2014_6498_MOESM6_ESM.pdf]

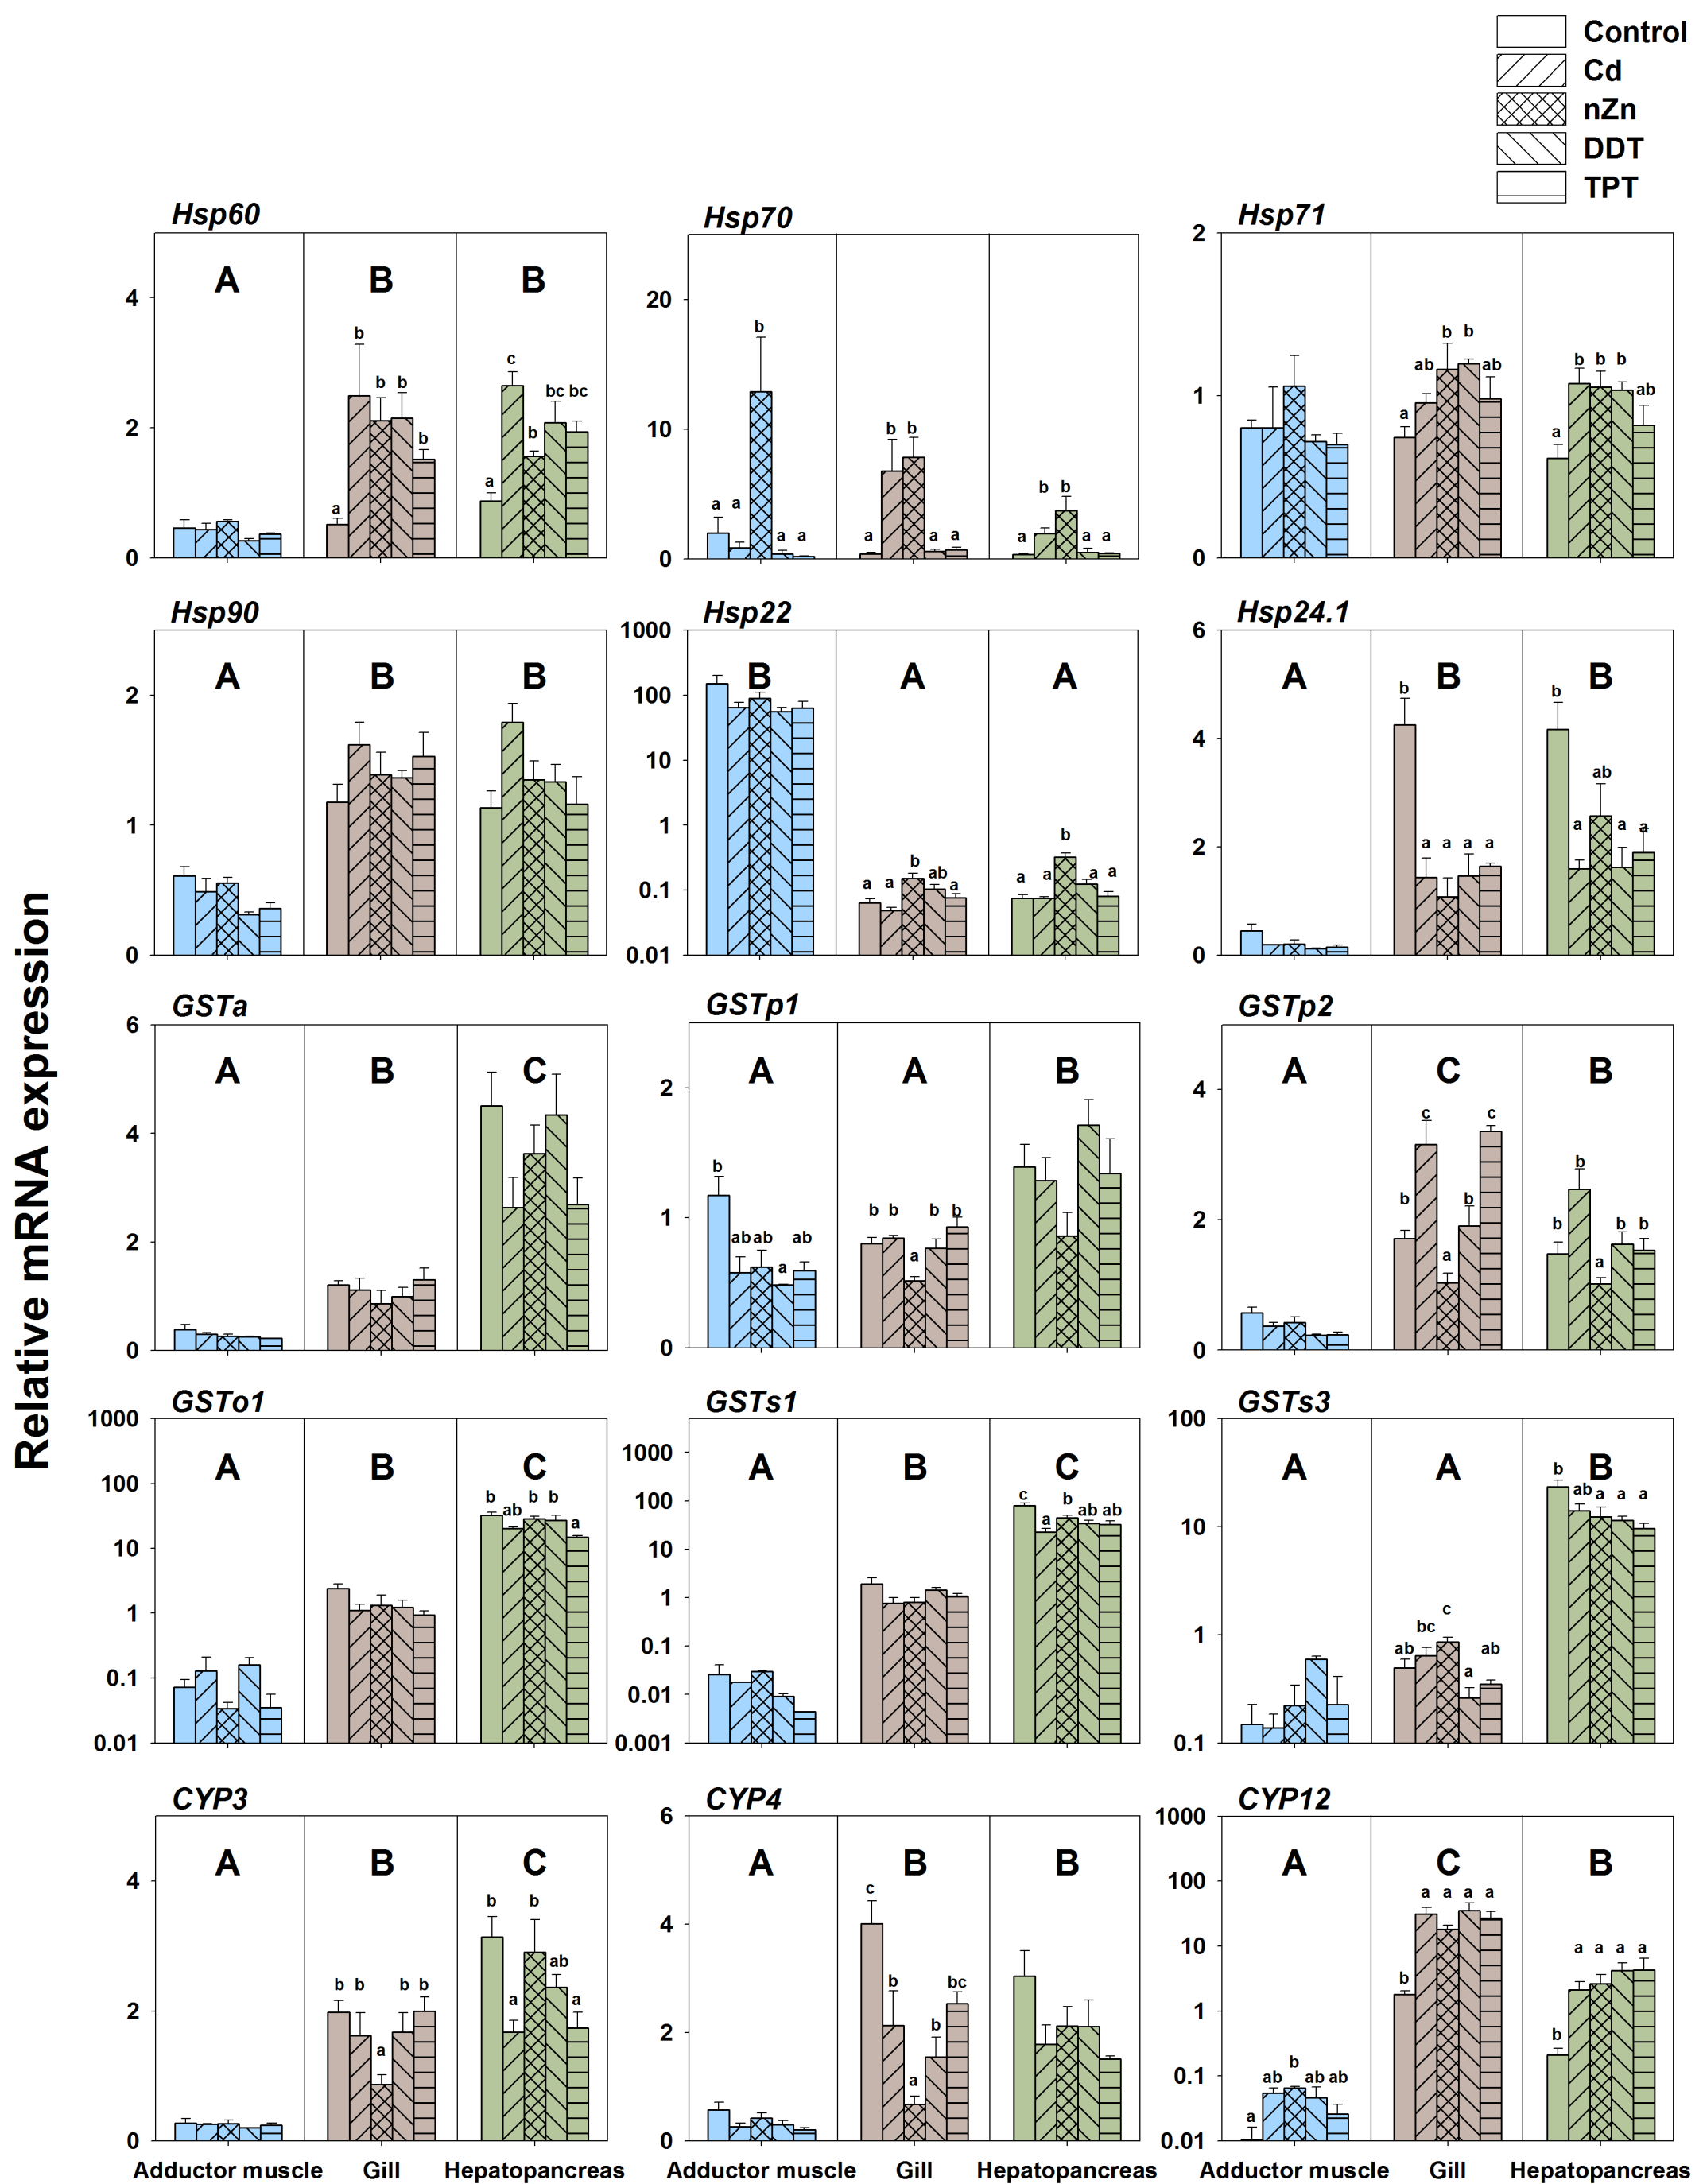

**Additional\_file\_6: Real-time qPCR analysis.** Relative mRNA expression levels of selected stress-associated genes from the gills, adductor muscle and hepatopancreas of *Perna viridis* after five different treatments (control; 730  $\mu\text{g/L}$   $\text{CdCl}_2$ ; 13  $\text{mg/L}$  nZnO; 40  $\mu\text{g/L}$  DDT; or 0.32  $\mu\text{g/L}$  TPTCl). HSP, heat shock protein; GST $\alpha$ , glutathione-S-transferase alpha-class; GST $\rho$ , glutathione-S-transferase pi-class; GST $\sigma$ , glutathione-S-transferase sigma-class; GST $\omega$ , glutathione-S-transferase omega-class; and CYP, cytochrome p450. Expression levels are presented as mean relative mRNA expression level + S.E. ( $n = 4$ ). Significant differences are denoted by uppercase letters (A, B and C) for tissues and lowercase letters (a, b and c) for treatments within each tissue (one-way ANOVA, SNK test;  $p < 0.05$ ).
