# Supplementary material for: De novo transcriptome analysis of Perna viridis highlights tissue-specific patterns for environmental studies
Source: PubMed Central journal article supplement (PMC4190305; doi:10.1186/1471-2164-15-804), 2014-09-19
Supplement: 12864_2014_6498_MOESM10_ESM.pdf [file 12864_2014_6498_MOESM10_ESM.pdf]

**Additional file 10. List of oligonucleotide primers used in real-time qPCR assays.**

| Gene ID            | Gene name                               | Gene abbreviation | Primer sequence (5' to 3') |                          |
|--------------------|-----------------------------------------|-------------------|----------------------------|--------------------------|
| comp96782_c0_seq2  | heat shock protein 60                   | <i>HSP60</i>      | Forward:                   | GTACCAAACATCGGGGCTAAA    |
|                    |                                         |                   | Reverse:                   | TGTGGCAGTTGTTGTTCCATCT   |
| comp95233_c0_seq1  | heat shock protein 70                   | <i>HSP70</i>      | Forward:                   | ATCTGGTGATCGAAGTGATGCT   |
|                    |                                         |                   | Reverse:                   | AGTTTGAGATGCTTTGGTTGGT   |
| comp76341_c0_seq1  | heat shock protein 71                   | <i>HSP71</i>      | Forward:                   | GACCAAGGAAACAGAACAACACC  |
|                    |                                         |                   | Reverse:                   | CTTGCAGCGTCACCAATAAGA    |
| comp76084_c0_seq1  | heat shock protein 90                   | <i>HSP90</i>      | Forward:                   | GGACAATTTGGTGTGGCTTCT    |
|                    |                                         |                   | Reverse:                   | TGGTTCTCCTGTTGCAGGTTT    |
| comp77735_c1_seq1  | small heat shock protein 22             | <i>HSP22</i>      | Forward:                   | CCAACCTTCGTGGAGGATTT     |
|                    |                                         |                   | Reverse:                   | CCTGGAGACTTTTCTTCGTGTTT  |
| comp67005_c0_seq1  | small heat shock protein 24.1           | <i>HSP24.1</i>    | Forward:                   | GGAAACTTCGTTAGCCGACA     |
|                    |                                         |                   | Reverse:                   | GACTTGGCCGTTCTCAACCTTC   |
| comp73832_c0_seq1  | Glutathione S-transferase alpha         | <i>GSTa</i>       | Forward:                   | GGCATGGGGTTTGTAGATGAA    |
|                    |                                         |                   | Reverse:                   | TCAGGAATTTGCAGGGTGACT    |
| comp75555_c0_seq1  | Glutathione S-transferase pi 1          | <i>GSTp1</i>      | Forward:                   | CCATACTGTCTCCTGGTTGTTTG  |
|                    |                                         |                   | Reverse:                   | CTGTTTGCATTCCCATTGA      |
| comp97391_c3_seq5  | Glutathione S-transferase pi 2          | <i>GSTp2</i>      | Forward:                   | GAAAGCCCATACAGCCTCATACTT |
|                    |                                         |                   | Reverse:                   | CTTGTCCGCCATTGTTGTGT     |
| comp89293_c0_seq20 | glutathione S-transferase sigma 1       | <i>GSTs1</i>      | Forward:                   | TTTAATGGGACGGGCAGAAC     |
|                    |                                         |                   | Reverse:                   | CTTGTCCAGCAGGTGATTTGG    |
| comp34627_c0_seq1  | glutathione s-transferase sigma 3       | <i>GSTs3</i>      | Forward:                   | GAACTTGCTCGACTTCTCTTTGCT |
|                    |                                         |                   | Reverse:                   | ATTTAACAGGTCCCCATTGCTC   |
| comp64310_c0_seq1  | Glutathione S-transferase omega 1       | <i>GSTo1</i>      | Forward:                   | TGTGCTTGGTTTTGTCCCTTC    |
|                    |                                         |                   | Reverse:                   | CTAATCCTCTCGGTTTCAGTTTC  |
| comp81566_c0_seq4  | cytochrome P450 family 3-like 3 protein | <i>CYP3</i>       | Forward:                   | GTAGGAATGAGACTGGCTTTGG   |
|                    |                                         |                   | Reverse:                   | GTCACCGGAACCTCTGTTTTCT   |
| comp90248_c0_seq1  | cytochrome P450 family 4                | <i>CYP4</i>       | Forward:                   | ATCATCGGTAGACAGGCGTCA    |
|                    |                                         |                   | Reverse:                   | ACAGTTGGGTTGTGGTGTAAAG   |
| comp56653_c0_seq1  | cytochrome P450 12b2, mitochondrial     | <i>CYP12</i>      | Forward:                   | CAGCCAAGACATTCAACTCCA    |
|                    |                                         |                   | Reverse:                   | ACCTTTCATCCTTCATCGCAAC   |
| Comp96598_c2_seq1  | 18S ribosomal RNA gene                  | <i>18S</i>        | Forward:                   | TGGGAAAGAGCGGTTTATTAG    |
|                    |                                         |                   | Reverse:                   | TGGGAAAGAGCGGTTTATTAG    |
